# Supplementary material for: Combination of mesenchymal stem cells (MSCs) and platelet-rich plasma (PRP) in the treatment of knee osteoarthritis: a meta-analysis of randomised controlled trials
Source: HighWire-hosted journal article supplement (doi:10.1136/bmjopen-2022-061008), 2022-11-01
Supplement: bmjopen-2022-061008supp001_data_supplement.pdf [file bmjopen-2022-061008supp001_data_supplement.pdf]

## Supplementary material

### Supplementary material 1 Retrieval strategy.

#### PubMed

#1 (((Mesenchymal Stromal Cell\*[Title/Abstract]) OR (Mesenchymal Stem Cell\*[Title/Abstract])) OR (Mesenchymal Progenitor Cell\*[Title/Abstract])) OR (Bone Marrow Stromal Cell\*[Title/Abstract])) OR (Stem cell\*[Title/Abstract])

#2 (((((((Osteoarthritis[MeSH Terms]) OR (Osteoarthritis[Title/Abstract])) OR (Osteoarthritis[Title/Abstract])) OR (Osteoarthroses[Title/Abstract])) OR (knee osteoarthritis[Title/Abstract])) OR (knee osteoarthritis[Title/Abstract])) OR (KOA[Title/Abstract])

#3 (((((((platelet-rich plasma[MeSH Terms]) OR (PRP[Title/Abstract])) OR (plasma rich in growth factors[Title/Abstract])) OR (platelet derived growth factor[Title/Abstract])) OR (platelet derived[Title/Abstract])) OR (platelet gel[Title/Abstract])) OR (platelet lysate[Title/Abstract])) OR (platelet rich plasma[Title/Abstract])

#4 #1 AND #2 AND #3

#### EMBASE

#1 'mesenchymal stromal cell\*':ab,ti OR 'mesenchymal stem cell\*':ab,ti OR 'mesenchymal progenitor cell\*':ab,ti OR 'bone marrow stromal cell\*':ab,ti

#2 osteoarthritis:ab,ti OR osteoarthritis:ab,ti OR osteoarthritis:ab,ti OR osteoarthroses:ab,ti OR 'knee osteoarthritis':ab,ti OR 'knee osteoarthritis':ab,ti OR koa:ab,ti

#3 'platelet-rich plasma':ab,ti OR prp:ab,ti OR 'plasma rich in growth factors':ab,ti OR 'platelet derived growth factor':ab,ti OR 'platelet derived':ab,ti OR 'platelet gel':ab,ti OR 'platelet lysate':ab,ti

#4 #1 AND #2 AND #3

#### Cochrane Library

#1 (knee osteoarthritis):ti,ab,kw OR (knee osteoarthritis):ti,ab,kw OR (osteoarthritis of Knee):ti,ab,kw OR (Osteoarthritis):ti,ab,kw OR (KOA):ti,ab,kw

#2 (platelet-rich plasma):ti,ab,kw OR (plasma rich in growth factors):ti,ab,kw OR (PRP):ti,ab,kw OR (platelet gel):ti,ab,kw OR (platelet lysate):ti,ab,kw

#3 (platelet-rich plasma):ti,ab,kw OR (plasma rich in growth factors):ti,ab,kw OR (PRP):ti,ab,kw OR (platelet gel):ti,ab,kw OR (platelet lysate):ti,ab,kw

#4 #1 AND #2 AND #3

#### CNKI

(TKA = '干细胞') AND (TKA = '富血小板血浆' OR TKA = '血小板凝胶' OR TKA = '血小板') AND (TKA = '膝关节炎' OR TKA = '关节炎' OR TKA = '膝关节炎')

## Supplementary Figure 1

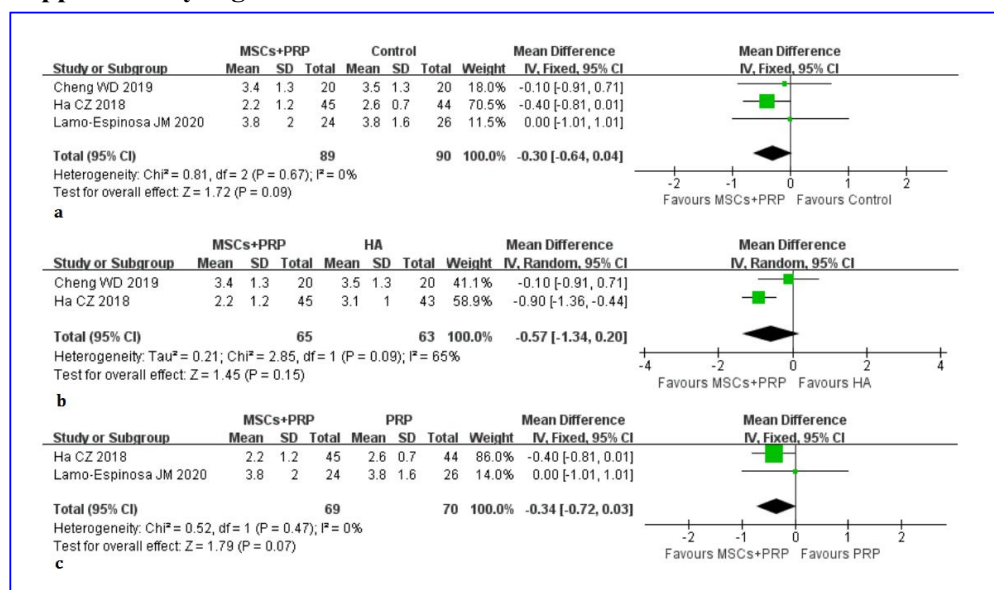

Supplementary Figure 1 Forest plot of VAS score 3 months after treatment : (a) MSCs+PRP vs control group (PRP and HA in control group); (b) MSCs+PRP vs HA; (c) MSCs+PRP vs PRP.

## Supplementary Figure 2

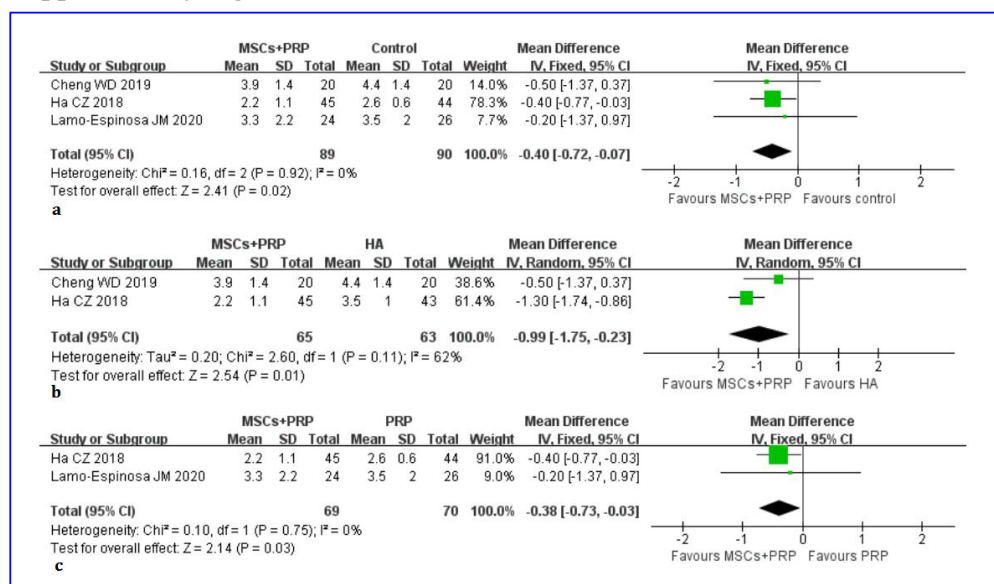

Supplementary Figure 2 Forest plot of VAS score 6 months after treatment : (a) MSCs+PRP vs control group (PRP and HA in control group); (b) MSCs+PRP vs HA; (c) MSCs+PRP vs PRP.

**Supplementary Figure 3**

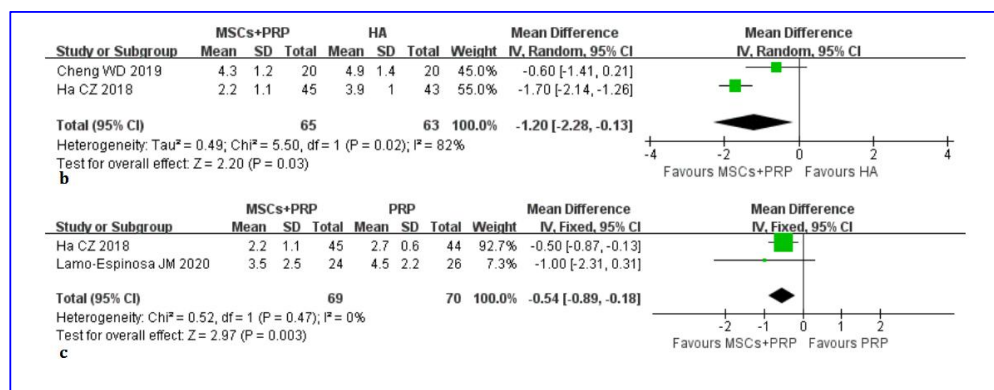

Supplementary Figure 3 Forest plot of VAS score 12 months after treatment : (b) MSCs+PRP vs HA; (c) MSCs+PRP vs PRP.

**Supplementary Figure 4**

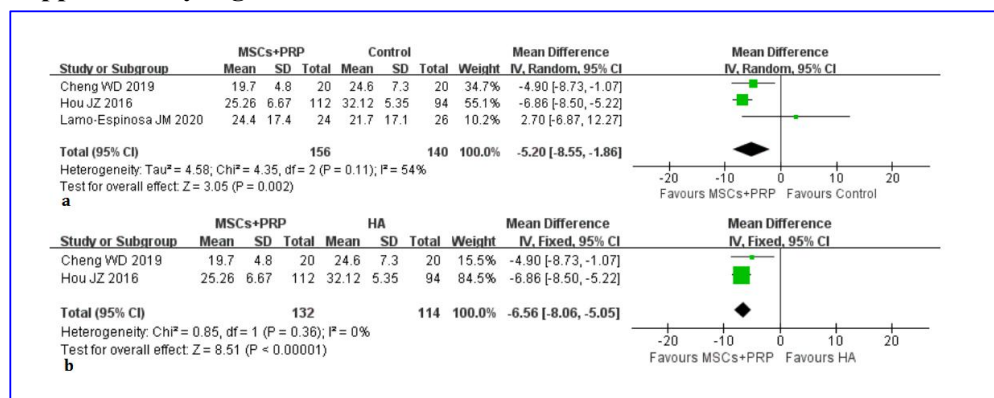

Supplementary Figure 4 Forest plot of WOMAC score 3 months after treatment : (a) MSCs+PRP vs control group (PRP and HA in control group); (b) MSCs+PRP vs HA.

## Supplementary Figure 5

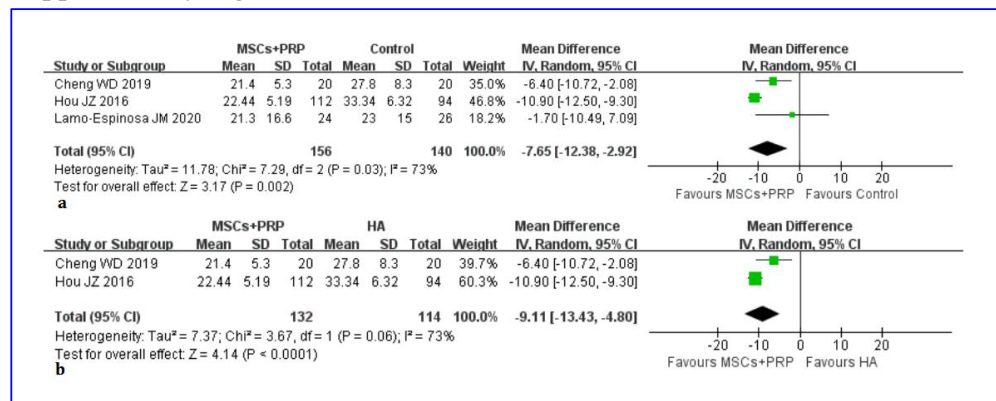

Supplementary Figure 5 Forest plot of WOMAC score 6 months after treatment : (a) MSCs+PRP vs control group (PRP and HA in control group); (b) MSCs+PRP vs HA.

## Supplementary Figure 6

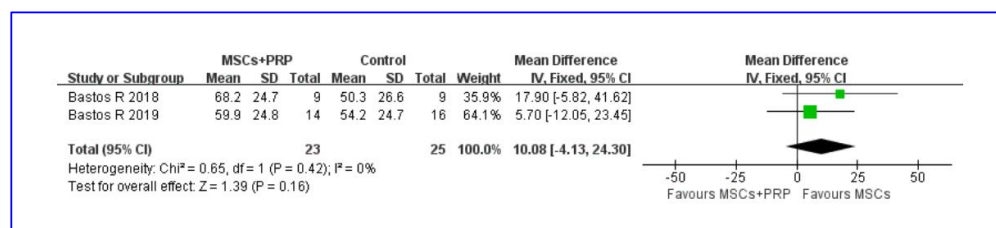

Supplementary Figure 6 Forest plot of KOOS 12 months after treatment : MSCs+PRP vs MSCs.

## Supplementary Figure 7

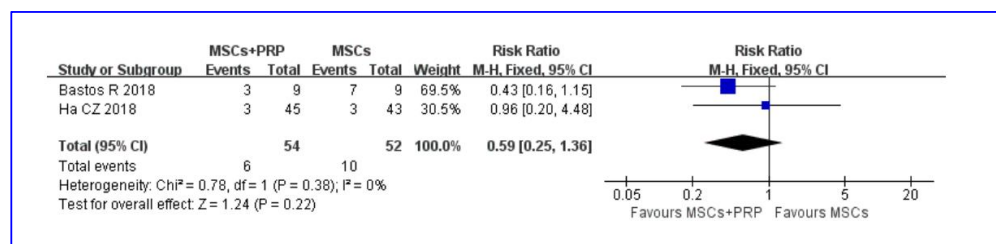

Supplementary Figure 7 Forest plot of adverse reaction : MSCs+PRP vs MSCs.
